# Supplementary material for: RNA-seq analysis reveals key genes associated with seed germination of Fritillaria taipaiensis P.Y.Li by cold stratification
Source: Front Plant Sci. 2022 Sep 28;13:1021572. doi: 10.3389/fpls.2022.1021572 (PMC9555243; doi:10.3389/fpls.2022.1021572)
Supplement: Supplementary file 7 [file Table_6.xlsx]

## Sheet: ABA pathway
		ABA biosynthesis
			ID	A	B	C	D	E	b	c	d	e
		ZEP-FtLi1	cluster11490-TRINITY_DN10_c0_g1_i2	10.92	6.3	6.53	6.06	3.08	11.12	10.42	4.22	4.53
		ZEP-FtLi2	cluster22160-TRINITY_DN3325_c0_g1_i2	30.01	14.56	16.54	15.54	10.56	34.13	31.94	13.3	14.44
		ZEP-FtLi3	cluster76580-TRINITY_DN21423_c0_g1_i5	28.14	22.39	20.41	20.96	12.29	31.45	30.08	17.94	20.63
		NCED-FtLi1	cluster38795-TRINITY_DN80349_c0_g1_i1	1.07	3.62	2.49	1.47	0.2	0.34	0.26	0.94	1.65
		NCED-FtLi2	cluster39309-TRINITY_DN61926_c0_g1_i1	0	0.9	0.84	0.94	0.16	0	0	0	1.3
		NCED-FtLi3	cluster20514-TRINITY_DN4370_c0_g1_i1	15.3	22.42	24.91	27.21	25.59	15.05	14.33	9.65	10.24
		NCED-FtLi4	cluster1331-TRINITY_DN33252_c0_g1_i26	3.96	0.19	0.38	0.06	0	3.74	3.21	0.78	0.14
		AAO3-FtLi1	cluster7564-TRINITY_DN1418_c0_g2_i4	29.37	12.83	13.9	15.87	9.95	43.29	41.99	9.97	21.32
		AAO3-FtLi2	cluster75653-TRINITY_DN5416_c0_g1_i2	4.06	1.23	1.66	1.47	0.28	11.54	7.49	4.36	0.76
		ABA signaling pathway
			ID	A	B	C	D	E	b	c	d	e
		PYR-FtLi1	cluster65449-TRINITY_DN39057_c0_g1_i1	4.02	2.55	0.59	0	0.53	0.46	0.84	1.85	3.83
		PYR-FtLi2	cluster65450-TRINITY_DN39057_c1_g1_i1	4.17	2.7	0.55	0.1	0	2.78	2.44	1.38	2.88
		AREB-FtLi1	cluster71454-TRINITY_DN3584_c0_g1_i1	28.4	11.07	9.19	8.15	5.08	28.82	28.32	28.16	21.75
		SnRK2s-FtLi1	cluster42184-TRINITY_DN17540_c0_g1_i2	235.43	161.07	155.68	154.77	59.58	259.6	255.1	147.88	104.61
		SnRK2s-FtLi2	cluster96228-TRINITY_DN39662_c0_g1_i1	39.64	25.14	19.99	20.49	24.49	52.24	48.97	24.17	41.37
		PP2C-FtLi1	cluster3338-TRINITY_DN715_c0_g1_i28	13.34	38.76	40.05	34.34	13.35	10.96	10.42	20.1	13.84
		PP2C-FtLi2	cluster61879-TRINITY_DN69869_c0_g1_i1	45.66	46.89	53.25	56.95	60.68	94.42	89.99	45.55	41.58
		PP2C-FtLi3	cluster21770-TRINITY_DN4496_c0_g4_i2	0.43	14.55	9.97	5.17	13.51	0.86	0.57	0.99	5.51
		PP2C-FtLi4	cluster78818-TRINITY_DN81221_c0_g1_i1	2.5	5.69	8.28	8.32	5.96	2.64	2.04	3.63	2.76
		PP2C-FtLi5	cluster14641-TRINITY_DN474_c0_g1_i3	5.54	7.57	8.66	9.95	19.9	9.14	8.67	4.33	5.4
		PP2C-FtLi6	cluster97789-TRINITY_DN48631_c0_g1_i1	7.23	16.24	19.03	18.26	2.29	6.23	6.26	5.49	9.8
		bZIP67-FtLi1	cluster11102-TRINITY_DN113_c0_g1_i2	3.61	0.41	0.27	0.14	0.17	2.78	2.83	0.9	1.31
		bZIP67-FtLi2	cluster66011-TRINITY_DN67885_c0_g2_i1	2.25	0.31	0.2	0.24	0.1	1.66	1.64	0.49	1.9
		bZIP67-FtLi3	cluster70080-TRINITY_DN9286_c1_g1_i1	9.8	1.56	0.47	0.7	0.47	6.87	5.88	1.01	7.41
		bZIP67-FtLi4	cluster17804-TRINITY_DN13608_c0_g1_i1	4.67	0.84	0.25	0.43	0.27	3.18	2.7	0.73	2.31
		ABI3-FtLi1	cluster75683-TRINITY_DN5401_c0_g1_i2	44.71	23.91	28.93	28.68	15.21	39.61	39.16	18.41	29.66
		ABI3-FtLi2	cluster1093-TRINITY_DN4440_c0_g1_i16	112.72	58	58.13	54.49	31.48	85.39	77.22	32.4	61.88
		ABI3-FtLi3	cluster14043-TRINITY_DN11420_c0_g1_i2	50.05	16.36	13.12	11.46	7.32	59.15	55.23	38.75	28.32
		ABI3-FtLi4	cluster8542-TRINITY_DN54439_c0_g1_i3	26.89	7.44	6.66	6.01	1.2	22.17	21.09	17.6	11.74
		ABI5-FtLi1	cluster10641-TRINITY_DN4795_c0_g1_i5	32.5	18.64	17.32	14.29	14.88	51.54	53.93	33.09	30.33
		ABI5-FtLi2	cluster65191-TRINITY_DN9567_c0_g1_i1	51.69	41.95	41.59	47.77	23.89	75.19	74.74	56.63	45.37
		ABI5-FtLi3	cluster67368-TRINITY_DN14688_c0_g1_i2	11.79	4.49	5.18	5.43	2.26	9.71	10.17	9.75	9.4
		ABI5-FtLi4	cluster87740-TRINITY_DN9075_c0_g2_i2	159.55	100.16	105.84	124.75	59	184.9	187.91	162.1	122.13
		ABA catabolism
			ID	A	B	C	D	E	b	c	d	e
		CYP707A-FtLi1	cluster3330-TRINITY_DN632_c0_g1_i13	0.41	3.01	4.39	5.18	25.1	0.4	0.3	0.43	1.23
		CYP707A-FtLi2	cluster55182-TRINITY_DN632_c0_g1_i15	0	0.07	0.07	0.05	0.31	0	0.11	0.08	0.09
		CYP707A-FtLi3	cluster55183-TRINITY_DN632_c0_g1_i16	1.02	8.34	7.24	8.12	12.58	0.62	0.94	0.91	2.99

## Sheet: GA pathway
		GA biosynthesis
			ID	A	B	C	D	E	b	c	d	e
		KAO-FtLi1	cluster14213-TRINITY_DN11811_c0_g2_i8	1.63	2.56	3.02	3.25	3.52	0.57	0.74	0.47	1.02
		KAO-FtLi2	cluster11171-TRINITY_DN190_c0_g1_i2	96.41	542.12	689.75	977.2	429.62	143.26	136.07	97.37	136.32
		KAO-FtLi3	cluster39365-TRINITY_DN36482_c0_g1_i5	0	0.53	2.18	3.29	3.36	0.04	0.04	0.06	0.36
		KAO-FtLi4	cluster19717-TRINITY_DN13017_c0_g1_i2	4.58	51.32	51.22	54.68	56.83	3.18	2.86	10.45	20.84
		KAO-FtLi5	cluster51011-TRINITY_DN1738_c0_g1_i29	9.2	12.87	17	19.1	21.95	9.17	8.46	7.88	9.46
		KAO-FtLi6	cluster6803-TRINITY_DN15164_c0_g1_i8	0.72	3.53	3.13	2.83	9.77	0.44	0.48	1.1	2.08
		KAO-FtLi7	cluster19719-TRINITY_DN77347_c0_g1_i2	0.06	0.54	0.49	0.81	8.71	0.09	0.08	0.12	0.31
		KAO-FtLi8	cluster70100-TRINITY_DN9291_c0_g1_i2	0	0.51	0.58	0.56	8.81	0	0	0	0.03
		KAO-FtLi9	cluster72178-TRINITY_DN82727_c0_g1_i1	0	0.45	0.74	1.29	14.08	0.06	0	0.04	0.06
		KAO-FtLi10	cluster74378-TRINITY_DN15410_c0_g1_i1	1.81	8.56	6.15	3.46	22.83	1.19	1.14	1.36	5.56
		KAO-FtLi11	cluster76030-TRINITY_DN4465_c0_g1_i7	33.43	71.16	60.89	58.07	174.32	39.62	41.7	45.42	70.93
		KO-FtLi1	cluster38278-TRINITY_DN49980_c0_g1_i1	29.52	67.34	69.11	59.53	7.93	17.43	16	37.33	35.99
		KO-FtLi2	cluster40871-TRINITY_DN6227_c0_g1_i2	14.7	40.97	43.36	43.26	23.68	28.58	29.76	13.48	32.59
		KO-FtLi3	cluster70418-TRINITY_DN20483_c0_g1_i1	0	1.36	1.58	2.48	3.31	0	0	0	0.04
		KO-FtLi4	cluster72203-TRINITY_DN66550_c0_g2_i1	0	2.15	2.77	3.35	2.84	0	0	0.13	0.67
		KO-FtLi5	cluster76027-TRINITY_DN4465_c0_g1_i1	12.16	23.26	23.93	25.22	39.5	11.26	9.54	7.32	11.04
		KO-FtLi6	cluster76029-TRINITY_DN4465_c0_g1_i6	0.92	4.91	4.19	5.68	6.53	0.92	0.53	1.65	3.35
		GA20ox-FtLi1	cluster41681-TRINITY_DN76903_c0_g1_i1	0.05	4.44	4.19	6.62	23.48	0.2	0.19	0.28	8.19
		GA20ox-FtLi2	cluster4647-TRINITY_DN23143_c0_g1_i10	11.23	135.03	141.69	151.18	180.82	12.98	10.5	10.15	37.94
		GA3ox-FtLi1	cluster77918-TRINITY_DN1033_c0_g1_i1	0.34	105.97	142.4	194.18	244.61	0.19	0.1	1.42	5.89
		GA3ox-FtLi2	cluster10167-TRINITY_DN1033_c0_g2_i11	0	38.06	51.99	74.42	204.84	0	0	0.31	3.39
		GA3ox-FtLi3	cluster23486-TRINITY_DN1033_c0_g2_i12	0	76.98	114.39	163.67	199.31	0	0	0.05	8.32
		GA3ox-FtLi4	cluster77924-TRINITY_DN1033_c0_g5_i1	1.08	201.26	261.62	378.37	393.3	1.41	0.73	2.12	19.76
		GA3ox-FtLi5	cluster19417-TRINITY_DN1018_c0_g1_i2	4.03	12.75	14.92	14.77	25.22	2.43	2.32	4.33	5.73
		GA3ox-FtLi6	cluster23472-TRINITY_DN3857_c0_g1_i2	0.03	4.06	6.17	5.8	16.07	0.03	0.03	0.04	0.48
		GA3ox-FtLi7	cluster10083-TRINITY_DN2731_c0_g1_i16	0.06	6.17	9.37	14.7	26.93	0.08	0	0.35	0.63
		GA3ox-FtLi8	cluster95124-TRINITY_DN2731_c0_g1_i26	0.48	39.91	54.32	68.42	78.24	0.83	0.74	0.77	5.05
		GA3ox-FtLi9	cluster95125-TRINITY_DN2731_c0_g1_i3	0.13	2.99	3.58	4.84	10.12	0	0.1	0.1	0
		GA3ox-FtLi10	cluster105943-TRINITY_DN33292_c0_g1_i1	0	1.97	3	3.67	6.91	0	0	0.03	0
		GA signaling pathway
			ID	A	B	C	D	E	b	c	d	e
		GID1-FtLi1	cluster28051-TRINITY_DN16015_c0_g1_i1	0.03	0.92	1.23	2.14	15.06	0	0	0	0.03
		GID1-FtLi2	cluster23617-TRINITY_DN16015_c0_g1_i2	0.03	14.16	18.71	22.98	113.94	0.03	0.07	0.98	1.8
		GID1-FtLi3	cluster28052-TRINITY_DN16015_c0_g1_i4	0	15.43	17.4	26.44	38.49	0.12	0.02	0.59	2.82
		GID1-FtLi4	cluster28053-TRINITY_DN16015_c0_g1_i6	0.09	0.28	0.34	0.71	1.85	0	0	0.04	0.04
		GID1-FtLi5	cluster45326-TRINITY_DN4288_c0_g1_i1	0.06	0.57	1.31	1.06	4.99	0.07	0	0.36	0.5
		GID1-FtLi6	cluster47497-TRINITY_DN53426_c0_g2_i1	0.33	2.14	1.04	0.61	2.72	0.11	0.38	0.2	1.31
		GID1-FtLi7	cluster53726-TRINITY_DN60149_c0_g1_i1	4.03	25.29	20.41	19.01	33.65	5.22	5.93	11.86	23.79
		GID1-FtLi8	cluster59522-TRINITY_DN44849_c0_g1_i1	0.05	1.12	0.46	0.23	0.84	0.05	0.3	0.31	1.21
		GID1-FtLi9	cluster730-TRINITY_DN74786_c0_g1_i6	3.13	10.57	8.32	8.23	17.12	5.7	4.93	6.46	11.17
		GID1-FtLi10	cluster67084-TRINITY_DN3234_c0_g1_i2	0.15	5.91	3.74	3.43	15.3	0.09	0.1	0.92	1.76
		GID1-FtLi11	cluster19356-TRINITY_DN3234_c0_g1_i5	0.47	1.5	1.17	1.23	8.33	0.35	0.96	0.5	2.44
		GID1-FtLi12	cluster23964-TRINITY_DN3234_c0_g1_i7	0.18	0.64	1.11	1.12	13.28	0.33	0.22	0.19	1.4
		GID1-FtLi13	cluster72667-TRINITY_DN33913_c0_g1_i1	0.72	8.94	3.66	1.31	7.84	1.31	1.72	1.59	3.49
		GID1-FtLi14	cluster14578-TRINITY_DN26676_c0_g2_i1	0.23	2.39	1.75	1.89	10.89	0.22	0.1	0.38	1.43
		GID1-FtLi15	cluster75995-TRINITY_DN26676_c0_g2_i3	0.36	1.12	1.66	1.57	5.8	0.39	0.57	0.56	0.81
		GID1-FtLi16	cluster19837-TRINITY_DN19409_c0_g1_i2	12.63	52.09	33.58	18.13	81.85	14.53	12.89	23.24	39.05
		DELLA-FtLi1	cluster33861-TRINITY_DN25727_c0_g1_i1	23	9.06	10.55	11.08	10.44	26.72	25.39	13.41	8.59
		DELLA-FtLi2	cluster15213-TRINITY_DN1193_c1_g1_i17	25.71	10.28	10.68	11.02	2.51	24.69	22.93	10.63	14.46
		DELLA-FtLi3	cluster90256-TRINITY_DN47604_c0_g1_i1	2.02	0	0	0	0	1.42	0.94	0.26	0.53
		DELLA-FtLi4	cluster95316-TRINITY_DN46043_c0_g1_i1	3.49	3	2.2	2.29	4.36	7.07	7	2.39	2.3
		DELLA-FtLi5	cluster95318-TRINITY_DN46043_c0_g1_i5	11.06	11.49	10.93	11.35	10.29	32.6	35.06	14.56	10.6
		DELLA-FtLi6	cluster18194-TRINITY_DN72258_c0_g1_i1	34.95	8.73	8.45	9.12	5.73	28.56	31.99	16.47	6.83
		DELLA-FtLi7	cluster101275-TRINITY_DN72258_c0_g1_i2	469.79	117.96	112.91	90.76	48.25	441.85	418.87	167.24	152.87
		GA catabolism
			ID	A	B	C	D	E	b	c	d	e
		GA2ox-FtLi1	cluster51687-TRINITY_DN8905_c0_g1_i18	0.58	0.8	1.82	1.69	0.87	0.32	0.34	0.48	0.46
		GA2ox-FtLi2	cluster6245-TRINITY_DN8905_c0_g1_i22	1.49	1.29	1.6	1.57	0.57	0.87	0.62	0.41	0.72
		GA2ox-FtLi3	cluster24062-TRINITY_DN8905_c0_g1_i4	1.47	2.96	3.15	3.36	1.02	0.8	0.94	0.48	1.13
		GA2ox-FtLi4	cluster5059-TRINITY_DN3819_c0_g1_i1	7.87	4.6	2.7	1.75	16.66	12.86	12.13	5.65	4.66
		GA2ox-FtLi5	cluster21403-TRINITY_DN3819_c0_g1_i11	0.04	1.67	0.64	0.25	4.25	1.2	0.53	0.31	0.07
		GA2ox-FtLi6	cluster19496-TRINITY_DN3819_c0_g1_i22	0.03	0.39	0.46	0.07	5.41	0.16	0.1	0.17	0.11
		GA2ox-FtLi7	cluster81381-TRINITY_DN3819_c0_g2_i1	0.25	0.41	0.2	0.27	3.1	1.18	1.47	0.82	0.75
		GA2ox-FtLi8	cluster81382-TRINITY_DN3819_c0_g2_i2	0	0.27	0.19	0.23	10.29	0	0	0.06	0.03
		GAMT-FtLi1	cluster75167-TRINITY_DN6047_c0_g1_i10	379.39	37.78	21.78	9.52	11.09	379.89	365	156.97	42.07
		GAMT-FtLi2	cluster75168-TRINITY_DN6047_c0_g1_i2	251.6	22.7	14.7	6.31	7.6	231.37	232.68	90.72	23.08
		GAMT-FtLi3	cluster75169-TRINITY_DN6047_c0_g1_i6	993.22	28.39	17.96	11.18	7.37	812.55	802.16	363.93	66.54
		GAMT-FtLi4	cluster75170-TRINITY_DN6047_c0_g1_i8	2.59	0.42	0.2	0.03	0.03	2.93	2.87	1.29	0.4

## Sheet: Auxin pathway
		Auxin biosynthesis
			ID	A	B	C	D	E	b	c	d	e
		TAA1-FtLi1	cluster24512-TRINITY_DN17152_c0_g2_i2	6.14	23.23	29.45	35.91	33.53	4.75	4.16	4.09	9.36
		TAA1-FtLi2	cluster82472-TRINITY_DN17152_c0_g2_i3	0.1	0.45	1.02	0.71	2.24	0	0	0	0.11
		TAA1-FtLi3	cluster98066-TRINITY_DN67129_c0_g1_i1	0	0.52	0.61	0.24	1.16	0	0.19	0.1	2.4
		TAA1-FtLi4	cluster98067-TRINITY_DN67129_c0_g2_i1	0	0.86	0.51	0.21	0.79	0.45	0.11	0.18	3.25
		YUCCA-FtLi1	cluster33854-TRINITY_DN25741_c0_g1_i1	0.08	0.33	0.12	0.09	1.85	0	0.07	0.1	0.05
		YUCCA-FtLi2	cluster53838-TRINITY_DN8243_c0_g3_i1	0	1.06	1.05	1.03	2.34	0	0	0	0.2
		YUCCA-FtLi3	cluster66470-TRINITY_DN10494_c0_g1_i1	0.26	18.36	21.96	27.91	3.56	0.14	0.32	0.93	6
		YUCCA-FtLi4	cluster9443-TRINITY_DN6536_c0_g1_i1	6.7	18.65	22.22	31	14.55	4.95	5.71	7.6	11.55
		YUCCA-FtLi5	cluster105686-TRINITY_DN42631_c1_g3_i1	0.57	3.66	3.76	3.18	2.77	0.26	0.11	4.34	0.8
		Auxin signaling pathway
			ID	A	B	C	D	E	b	c	d	e
		ARF-FtLi1	cluster35102-TRINITY_DN27430_c0_g1_i1	0	0	0.53	0.25	2.4	0	0	0	0
		ARF-FtLi2	cluster36588-TRINITY_DN30235_c0_g1_i1	0.03	1.05	1.11	1.53	49.33	0.23	0.23	0.09	0.54
		ARF-FtLi3	cluster36764-TRINITY_DN81738_c0_g1_i1	0.2	1.39	1.41	1.68	12.27	0	0.1	0.24	0.75
		ARF-FtLi4	cluster6936-TRINITY_DN54872_c0_g1_i5	53.59	47.59	54.04	52.2	104.74	25.23	26.25	16.49	48.78
		ARF-FtLi5	cluster52666-TRINITY_DN54872_c0_g2_i2	77.3	60	56.16	58.95	134.37	61.67	61.97	35.71	67.69
		ARF-FtLi6	cluster64081-TRINITY_DN14287_c0_g1_i1	0.59	0.45	0.73	0.74	2.43	0.38	0.37	0.32	0.94
		ARF-FtLi7	cluster16708-TRINITY_DN1488_c0_g1_i27	0.38	0.19	0.08	0.61	4.16	0.15	0.18	0	0.34
		ARF-FtLi8	cluster4067-TRINITY_DN1488_c0_g1_i8	0.75	0.75	1.76	2.92	11.16	0.27	0.45	0.17	0.68
		ARF-FtLi9	cluster78383-TRINITY_DN80625_c0_g1_i1	0	1.69	1.88	1.58	15.2	0	0	0	0.07
		ARF-FtLi10	cluster22421-TRINITY_DN70517_c0_g1_i2	0.06	1.46	1.91	2.26	13.68	0.25	0.11	0.32	0.94
		GH3-FtLi1	cluster46298-TRINITY_DN1172_c0_g1_i10	0.12	4.04	1.36	0.35	1.18	0.41	0.78	0.3	1.17
		GH3-FtLi2	cluster46303-TRINITY_DN1172_c0_g1_i6	0.55	8.02	3.22	1.49	3.13	0.58	0.59	1.36	2.73
		GH3-FtLi3	cluster46304-TRINITY_DN1172_c0_g1_i8	0	2.73	1.17	0.15	1.2	0	0	0	0
		GH3-FtLi4	cluster90649-TRINITY_DN56488_c0_g1_i1	0.64	39.16	13.7	4.69	15.27	1.69	1.5	3.06	6.5
		GH3-FtLi5	cluster99249-TRINITY_DN10515_c0_g1_i1	3.76	11	9.71	8.31	5.55	2.34	1.52	1.78	4.24
		SAUR-FtLi1	cluster43369-TRINITY_DN16270_c0_g1_i1	0	0.25	0.5	1.92	9.8	0	0	0	0
		SAUR-FtLi2	cluster45655-TRINITY_DN46917_c0_g1_i1	0.13	1.33	1.88	3.25	21.96	0.41	0.3	2.09	0.69
		SAUR-FtLi3	cluster47492-TRINITY_DN53496_c0_g1_i1	0	0.33	0.89	0.98	5.92	0	0	0	0.08
		SAUR-FtLi4	cluster57740-TRINITY_DN62857_c0_g1_i1	0	0.69	0.37	0.18	4.92	0	0	0.09	0.13
		SAUR-FtLi5	cluster61927-TRINITY_DN79881_c0_g1_i1	0	1.3	2.44	3.68	13.11	0	0	0.29	0.37
		SAUR-FtLi6	cluster69426-TRINITY_DN6378_c0_g1_i1	0.65	3.67	3.87	5.58	10.4	0.3	0.41	0.69	2.01
		SAUR-FtLi7	cluster9838-TRINITY_DN21022_c0_g1_i3	0.31	1.2	3.06	1.91	5.63	0.38	0.12	0	2.24
		SAUR-FtLi8	cluster9053-TRINITY_DN28287_c0_g1_i4	0.11	1.8	1.92	1.26	2.46	0.32	0.1	0.04	0.53
		SAUR-FtLi9	cluster91917-TRINITY_DN10346_c0_g2_i1	0.47	2.18	2.17	2.54	3.15	0.37	0.79	2.34	0.46
		SAUR-FtLi10	cluster23597-TRINITY_DN3138_c0_g1_i1	0	0.26	0.11	0.52	19.5	0	0	0	0.09
		SAUR-FtLi11	cluster103024-TRINITY_DN34462_c0_g1_i1	0	0.61	0	0.58	8.42	0	0	0	0.48
		SAUR-FtLi12	cluster105354-TRINITY_DN35284_c0_g1_i1	0.24	3.55	0.93	0.44	5.28	0.72	0.22	0.42	0.41
		SAUR-FtLi13	cluster106004-TRINITY_DN15924_c0_g2_i1	0	0.03	0.28	0.16	4.68	0	0	0	0.13
		Auxin influx carrier
			ID	A	B	C	D	E	b	c	d	e
		AUX1-FtLi1	cluster37166-TRINITY_DN1394_c0_g1_i8	7.29	33.17	24.12	19.31	33.46	11.42	9.35	3.45	13.31
		AUX1-FtLi2	cluster20695-TRINITY_DN39366_c0_g1_i2	13.05	25.52	27.18	38.47	63.42	17.15	15.85	36.13	18.05
		AUX1-FtLi3	cluster51746-TRINITY_DN8930_c0_g1_i15	0	0.24	0.43	0.15	6.12	0	0	0	0.15
		AUX1-FtLi4	cluster23951-TRINITY_DN33003_c0_g1_i2	0	0.23	0.92	0.52	3.2	0	0	0	0
		AUX1-FtLi5	cluster58137-TRINITY_DN6883_c0_g1_i3	0	13.68	24.61	39.95	89.13	0	0	0.79	4.23
		AUX1-FtLi6	cluster11673-TRINITY_DN845_c0_g1_i33	0.57	3.41	4.74	6.33	7.68	0.88	0.7	0.57	2.01
		AUX1-FtLi7	cluster102306-TRINITY_DN41325_c0_g1_i1	2.15	22.36	24.88	26.78	42.27	2.62	1.83	3.76	14.17
		AVP-FtLi1	cluster44730-TRINITY_DN9676_c0_g1_i1	144.31	416.32	463.7	538.3	480.24	241.52	225.21	112.56	303.64
		AVP-FtLi2	cluster11646-TRINITY_DN4999_c1_g1_i3	60.47	168.19	182.92	157.96	197.43	45.83	42.98	36.35	88.68
		AVP-FtLi3	cluster89041-TRINITY_DN4999_c1_g1_i4	47.08	135.69	131.92	161.44	192.27	47.69	48.57	68.34	98.32
		AVP-FtLi4	cluster379-TRINITY_DN452_c0_g1_i33	58.23	152.34	172.2	170	162.4	83.15	77.4	30.42	99.71
		PIN-FtLi1	cluster8547-TRINITY_DN6985_c0_g1_i1	2.3	5.33	5.54	6.4	10.09	0.87	0.68	0.85	3.9
		PIN-FtLi2	cluster53074-TRINITY_DN7560_c0_g1_i4	0.34	5.84	4.42	4.38	7.29	0	0.2	0.58	2.52
		PIN-FtLi3	cluster13251-TRINITY_DN5731_c0_g1_i1	0.3	0.25	0	0.11	3.94	0	0.33	0.02	0.07
		PIN-FtLi4	cluster65235-TRINITY_DN5731_c0_g1_i6	0.32	1.54	0.44	0.63	14.1	0	0.25	0.01	0.33
		PIN-FtLi5	cluster65236-TRINITY_DN5731_c0_g1_i9	0.21	3	1.66	0.43	4.56	1.11	0.97	0.07	0.62
		PIN-FtLi6	cluster86506-TRINITY_DN23270_c0_g1_i1	0.81	9.8	4.85	1.56	21.57	0.1	0.27	0.08	2.01
		PIN-FtLi7	cluster17268-TRINITY_DN15097_c0_g1_i1	24.11	24.33	21.54	20.47	35.16	23.05	23.57	27.64	21.58
		PIN-FtLi8	cluster100342-TRINITY_DN1652_c0_g2_i5	0.65	5.23	4.7	5.34	12.19	0.69	0.55	0.96	2.39
		PIN-FtLi9	cluster100344-TRINITY_DN1652_c3_g1_i1	0.56	10.91	13.53	11.42	29.21	0.66	0.53	1.06	4.2
		Auxin Catabolism
			ID	A	B	C	D	E	b	c	d	e
		VAS1-FtLi1	cluster32163-TRINITY_DN18215_c0_g1_i1	0.72	1.42	0.92	0.4	0.37	9.87	7.98	1.29	6.44
		VAS1-FtLi2	cluster32706-TRINITY_DN17750_c0_g1_i1	0	0	0.09	0	0	2.27	1.31	0.71	2.38
		VAS1-FtLi3	cluster35828-TRINITY_DN64513_c0_g2_i1	1.87	0.04	0.03	0.04	0	0.95	0.75	0.88	1.8
		VAS1-FtLi4	cluster40190-TRINITY_DN6973_c0_g1_i18	1.03	0.54	0.22	0.17	0.21	3.47	3.8	4.19	3.28
		VAS1-FtLi5	cluster24384-TRINITY_DN68784_c0_g1_i1	2.06	0.88	0.36	0.16	0.05	1.11	0.51	1.15	0.74
		VAS1-FtLi6	cluster41777-TRINITY_DN68784_c0_g3_i1	2.06	0.43	0.22	0.35	0.12	0.58	1.38	0.22	1.88
		VAS1-FtLi7	cluster1900-TRINITY_DN6014_c0_g1_i1	2.49	0.24	0.09	0.15	0.04	2.97	2.88	1.05	2.94
		VAS1-FtLi8	cluster78193-TRINITY_DN31288_c0_g2_i1	1.73	0.34	0.24	0.35	0.14	2.36	1.9	0.66	2.65
		VAS1-FtLi9	cluster82752-TRINITY_DN50945_c0_g1_i1	1.86	0.1	0.12	0.12	0.02	1.95	1.4	1.16	2.43
		VAS1-FtLi10	cluster90740-TRINITY_DN58648_c0_g1_i1	1.29	0.08	0.08	0.07	0.02	0.69	1.33	0.11	0.83
		VAS1-FtLi11	cluster92520-TRINITY_DN26176_c0_g2_i3	1.53	0.25	0.32	0.2	0	0.45	0.82	1.01	1.36

## Sheet: Related embryo development
		ID	A	B	C	D	E	b	c	d	e
	GOS1-FtLi1	cluster41262-TRINITY_DN3765_c0_g1_i1	1.41	1.98	2.04	1.9	2.96	1.31	1.26	1.11	1.45
	GOS1-FtLi2	cluster62811-TRINITY_DN31397_c0_g1_i1	0.14	0.96	1.06	0.85	1.84	0.15	0.09	0.15	0.91
	GOS1-FtLi3	cluster65732-TRINITY_DN27814_c1_g1_i1	10.39	18.08	15.41	14.1	22.16	9.52	9.23	9.59	15.24
	GOS1-FtLi4	cluster68203-TRINITY_DN17378_c0_g1_i3	0	3.81	2.86	2.24	3.51	0	0	1.1	0.72
	GOS1-FtLi5	cluster71440-TRINITY_DN3536_c0_g2_i1	0.38	3.92	4.5	4.45	8.5	0.26	0.24	0.84	1.74
	GOS1-FtLi6	cluster74676-TRINITY_DN11601_c0_g1_i1	4.3	10.79	10.34	10.77	19.96	4.69	4.45	4.58	5.9
	GOS1-FtLi7	cluster14047-TRINITY_DN4472_c0_g1_i1	0.41	1.6	1.81	1.7	6.31	0.08	0.17	0.15	0.26
	GOS1-FtLi8	cluster78573-TRINITY_DN60223_c0_g2_i1	0.15	0.84	0.72	0.64	3.99	0.07	0.02	0.55	0.36
	GOS1-FtLi9	cluster80566-TRINITY_DN33735_c0_g1_i1	0.12	1.68	1.92	1.54	1.8	0.09	0.05	0.2	0.75
	GOS1-FtLi10	cluster90065-TRINITY_DN23637_c0_g1_i1	0.15	0.87	1.2	1.79	7.26	0.04	0.06	0.01	0.07
	GOS1-FtLi11	cluster91943-TRINITY_DN10316_c1_g1_i1	9.76	31.67	41.02	48.42	40.78	6.15	5.05	8.25	11.69
	GOS1-FtLi12	cluster96701-TRINITY_DN70803_c0_g2_i1	0.08	4.69	5.16	5.13	8.62	0.1	0.04	0.32	4.04
	GOS1-FtLi13	cluster100316-TRINITY_DN1663_c1_g1_i1	2.99	10.12	11.08	12.76	29.22	3.43	2.77	2.49	7.33
	GOS1-FtLi14	cluster103109-TRINITY_DN25514_c0_g1_i1	3.03	5.06	4.8	5.84	12.44	2.82	2.58	3.41	4.92
	WOX-FtLi1	cluster22552-TRINITY_DN8812_c0_g1_i7	6.48	16.43	19.89	19.06	22.19	4.74	3.95	6.86	11.67
	WOX-FtLi2	cluster34859-TRINITY_DN79621_c0_g1_i1	0.4	6.96	7.54	9.06	5.57	0.42	0.31	0.65	2.35
	WOX-FtLi3	cluster2384-TRINITY_DN2239_c0_g1_i12	1.54	3.2	4.3	4.85	4.24	1.01	1.41	1.07	1.95
	WOX-FtLi4	cluster53888-TRINITY_DN33047_c0_g1_i1	0.06	0.65	0.79	1.09	1.53	0.39	0.29	0.4	0.49
	WOX-FtLi5	cluster10317-TRINITY_DN6476_c1_g1_i2	0	1.15	1.05	1.67	3.41	0.29	0.11	0.05	0.57
	WOX-FtLi6	cluster70713-TRINITY_DN599_c0_g2_i1	3.86	16.33	18.73	25.06	10.63	6.79	7.13	3.81	8.04
	WOX-FtLi7	cluster16895-TRINITY_DN3625_c0_g1_i17	0.56	2.14	1.98	2.01	4.4	0.68	0.59	0.55	1.44
	WOX-FtLi8	cluster98935-TRINITY_DN55161_c0_g1_i1	0.94	3.35	3.27	4.01	5.37	0.95	0.82	0.88	2.66
	WOX-FtLi9	cluster100093-TRINITY_DN15066_c0_g1_i2	9.47	39.89	44.14	44.86	56.37	8.96	6.49	6.82	20.13
	LEA-FtLi1	cluster25667-TRINITY_DN21652_c0_g1_i1	9.58	2.94	3.31	2.79	0	12.53	11.74	2.39	3.33
	LEA-FtLi2	cluster56495-TRINITY_DN12526_c0_g1_i5	3.02	4.66	3.93	3.53	0.8	1.42	0.75	1.07	2.49
	LEA-FtLi3	cluster19243-TRINITY_DN12526_c0_g1_i7	0.19	9.84	16.51	18.36	24.56	0	0	0	1.49
	LEA-FtLi4	cluster92084-TRINITY_DN81155_c0_g1_i1	246.65	1608.33	1922.95	1762.3	185.44	199.07	202.7	279.84	926.12
	LEA-FtLi5	cluster93258-TRINITY_DN482_c0_g1_i13	432.82	586.35	727.79	632.31	89.12	346	346.91	321.64	403.04
	LEA-FtLi6	cluster93259-TRINITY_DN482_c0_g1_i4	4.04	324.98	477.62	573.57	63.54	3.98	3.9	5.97	14.77
	LEA-FtLi7	cluster93260-TRINITY_DN482_c0_g1_i7	1100.72	1303.39	1274.54	1150.12	188.66	856.31	799.4	1312.79	1238.56
	LEA-FtLi8	cluster93261-TRINITY_DN482_c0_g1_i8	12.12	397.54	642.92	782.25	36.07	11.92	12.87	20.06	21.14
	EXPA-FtLi1	cluster2706-TRINITY_DN2038_c0_g1_i17	0.29	6.18	4.28	4.12	59.54	0.18	0.19	1.76	4.79
	EXPA-FtLi2	cluster30642-TRINITY_DN2038_c0_g1_i18	0.07	3.55	2.77	3.64	44.3	0.54	0.22	0.53	3.27
	EXPA-FtLi15	cluster2823-TRINITY_DN19605_c0_g1_i3	0	0.09	0	0	18.42	0	0	0	0
	EXPA-FtLi10	cluster43573-TRINITY_DN55646_c0_g1_i1	0	0.06	0.03	0.03	2.67	0.04	0	0	0
	EXPA-FtLi14	cluster45506-TRINITY_DN7003_c0_g1_i1	10.63	18.56	19.96	23.85	19.74	12.59	10.89	12.67	14.98
	EXLA-FtLi5	cluster46728-TRINITY_DN4136_c0_g1_i16	94.76	55.48	51.58	41.66	97.98	71.69	76.53	220.85	86.78
	EXLA-FtLi1	cluster46729-TRINITY_DN4136_c0_g1_i2	29.29	32.77	30.61	21.12	2.45	18.3	19.94	49.22	46.35
	EXLA-FtLi3	cluster46730-TRINITY_DN4136_c0_g1_i21	0.26	1.63	1.6	1.01	0.09	0	0	2.26	2.22
	EXLA-FtLi2	cluster46731-TRINITY_DN4136_c0_g1_i7	0.84	1.04	1.01	0.25	0.93	0.23	0.51	0.5	2.51
	EXLA-FtLi4	cluster46732-TRINITY_DN4136_c0_g1_i9	0.01	0.05	0.05	0.01	0.03	0	0	0.01	0.14
	EXLB-FtLi1	cluster46994-TRINITY_DN83241_c0_g1_i1	15.1	1.44	0.96	0.33	0.8	19.54	18.83	4.15	2.71
	EXPA-FtLi4	cluster55213-TRINITY_DN640_c0_g1_i1	0.04	3.85	4.65	6.34	75.89	0.08	0.04	0.04	1.53
	EXLA-FtLi6	cluster55926-TRINITY_DN61333_c0_g1_i1	0	0.18	0.43	0.21	2.97	0	0	0	0.05
	EXPA-FtLi12	cluster23573-TRINITY_DN66474_c0_g1_i3	0	0.4	0.59	0.77	1.32	0	0	0.05	0.75
	EXPA-FtLi13	cluster10165-TRINITY_DN66474_c0_g1_i5	0	0.48	0.46	0.92	4.08	0.04	0.03	0	0.08
	EXPA-FtLi11	cluster18381-TRINITY_DN32495_c0_g1_i1	1.68	5.78	4.81	4.12	23.24	0.67	0.66	1.4	2.44
	EXPA-FtLi9	cluster23616-TRINITY_DN11662_c0_g1_i1	0.02	4.32	3.86	4.87	33.98	0.05	0.08	0.82	1.61
	EXPA-FtLi5	cluster77295-TRINITY_DN2500_c0_g1_i3	0	0.04	0.11	0.18	4.4	0	0	0.15	0.08
	EXPA-FtLi7	cluster1843-TRINITY_DN2500_c0_g1_i7	2.78	7.32	6.95	5.33	5.79	2.73	2.55	0.48	6.75
	EXPA-FtLi8	cluster77296-TRINITY_DN2500_c0_g2_i1	0.2	6.61	5.62	4.11	8.96	0.17	0.15	0.97	3.45
	EXPA-FtLi3	cluster81924-TRINITY_DN71465_c0_g1_i1	0	1.15	1.5	1.06	0.42	0.14	0.06	0.08	1.54
	EXPB-FtLi1	cluster10100-TRINITY_DN20793_c0_g1_i9	0.04	0.68	0.65	0.71	3.97	0	0.07	0	0.43
	EXPB-FtLi2	cluster99226-TRINITY_DN20793_c0_g2_i1	0.05	0.19	0	0.11	4.08	0.03	0	0.03	0.1
	EXPA-FtLi6	cluster103394-TRINITY_DN7853_c0_g1_i1	0	0	0	0	4.04	0.04	0	0	0

## Sheet: Dormancy and cold  response
	Dormancy related
		ID	A	B	C	D	E	b	c	d	e
	MFT-FtLi1	cluster31683-TRINITY_DN77695_c0_g1_i1	3.78	0.44	0.03	0.07	0.1	0.93	1.31	0.17	1.09
	MFT-FtLi2	cluster14664-TRINITY_DN11182_c0_g1_i1	982.42	625.6	644.03	511.37	28.36	772.94	808.57	533.16	848.31
	MFT-FtLi3	cluster57827-TRINITY_DN83834_c0_g1_i1	0	0.99	2.21	1.92	0.19	0.42	0	0	2.69
	MFT-FtLi4	cluster63563-TRINITY_DN34356_c0_g1_i1	1.99	1.07	0.48	0.04	0	0.11	0.2	0.19	0.93
	MFT-FtLi5	cluster77059-TRINITY_DN24517_c0_g1_i1	0.76	0	0	0.1	0	0.33	1.85	0	3.24
	MFT-FtLi6	cluster82437-TRINITY_DN17105_c0_g1_i1	1.48	0.39	0.27	0.57	0.19	2.12	1.66	1.12	3.7
	MFT-FtLi7	cluster82438-TRINITY_DN17105_c0_g2_i1	0.84	1.02	0.54	0.34	0.23	0.37	0.44	0.6	1.72
	MFT-FtLi8	cluster88708-TRINITY_DN60596_c0_g1_i1	0	0	0	0.08	0	0	0	0	6.34
	MFT-FtLi9	cluster92868-TRINITY_DN37166_c0_g1_i1	1.63	0.83	0.45	0.72	0.9	0.8	0.6	81.63	0.04
	DOG1-FtLi1	cluster4762-TRINITY_DN12878_c0_g1_i2	143.45	95.37	92.19	82.45	35.5	140.87	132.1	93.25	124.45
	DOG1-FtLi2	cluster33108-TRINITY_DN12878_c1_g1_i1	1.05	1.72	1.26	0.69	0.74	2.22	1.57	1.05	2.26
	DOG1-FtLi3	cluster11102-TRINITY_DN113_c0_g1_i2	3.61	0.41	0.27	0.14	0.17	2.78	2.83	0.9	1.31
	DOG1-FtLi4	cluster11103-TRINITY_DN113_c0_g1_i4	44.03	26.34	25.04	21.65	17.01	58.49	57.39	36.05	29.92
	DOG1-FtLi5	cluster54292-TRINITY_DN34801_c0_g1_i4	66.48	55.62	52.35	58.98	36.67	79.69	77.48	56.72	54.26
	DOG1-FtLi6	cluster6636-TRINITY_DN34801_c0_g2_i2	15.49	9.71	10.52	10.62	10.92	23.73	23.59	15.64	10.92
	DOG1-FtLi7	cluster54293-TRINITY_DN34801_c0_g2_i4	3.43	1.75	1.92	1.66	0.65	5.75	5.9	4.58	2.73
	DOG1-FtLi8	cluster54294-TRINITY_DN34801_c0_g2_i5	38.71	21.09	23.26	22.99	18.4	49.92	49.77	18.37	24.58
	EM6-FtLi1	cluster75235-TRINITY_DN6025_c0_g1_i1	307.44	191.27	216.69	215.56	1.24	334.39	298.46	188.47	113.45
	EM6-FtLi2	cluster75237-TRINITY_DN6025_c0_g1_i2	56.69	36.5	48.92	51.55	0	65.26	57.25	37.39	18.42
	EM6-FtLi3	cluster75238-TRINITY_DN6025_c0_g1_i3	576.07	191.59	217.6	179.9	1.76	617.26	562.32	315.7	309.36
	Cold response
		ID	A	B	C	D	E	b	c	d	e
	CBF-FtLi1	cluster10279-TRINITY_DN14553_c0_g1_i1	0	0.72	0.51	0.92	2.46	0.04	0.08	0.33	0.51
	CBF-FtLi2	cluster73803-TRINITY_DN28067_c0_g1_i1	0.71	0.41	0.89	0.93	0.53	0.59	0.69	0.31	0.8
	CBF-FtLi3	cluster3877-TRINITY_DN29704_c0_g1_i30	87.84	47.45	53.59	43.05	23.42	117.96	106.87	38.51	225.77
	ICE1-FtLi1	cluster32853-TRINITY_DN83305_c0_g1_i1	0	0.45	0.72	1.43	4.49	0	0	0	0
	ICE1-FtLi2	cluster14257-TRINITY_DN27476_c0_g1_i1	0.64	4.3	5.52	5.76	14.59	1.15	1.23	2.42	4.93
	ICE1-FtLi3	cluster19140-TRINITY_DN6625_c0_g1_i2	0.08	2.83	3.87	5.93	16.02	0.01	0.04	0.22	0.58
	ICE1-FtLi4	cluster38728-TRINITY_DN80362_c0_g1_i1	0.1	3.61	4.55	7.64	13.15	0.06	0.26	0.52	1.39
	ICE1-FtLi5	cluster10215-TRINITY_DN5234_c0_g1_i6	0.06	2	2.29	3.07	22.62	0.05	0.11	0.41	0.51
	ICE1-FtLi6	cluster42909-TRINITY_DN43681_c0_g1_i1	0.64	0.69	0.64	0.53	12.21	0.77	0.55	0.63	1.1
	ICE1-FtLi7	cluster44927-TRINITY_DN48049_c0_g1_i1	0.17	3.98	4.62	5.85	7.76	0.34	0.1	0.28	1.37
	ICE1-FtLi8	cluster23887-TRINITY_DN7056_c0_g1_i3	0	0.63	0.38	0.73	18.37	0	0	0	0.33
	ICE1-FtLi9	cluster23842-TRINITY_DN10278_c0_g1_i1	0	1.59	1	1.21	12.09	0	0.06	0	0.25
	ICE1-FtLi10	cluster48592-TRINITY_DN992_c0_g1_i5	11.48	31.42	36.03	40.05	45.9	13.19	12.9	28.03	19.37
	ICE1-FtLi11	cluster49943-TRINITY_DN1239_c0_g1_i6	1.76	9.42	10.96	12.63	24.98	1.48	1.1	1.94	7.09
	ICE1-FtLi12	cluster62148-TRINITY_DN6436_c0_g1_i1	0.04	4.72	4.28	0.66	9.29	0	0	0	0
	ICE1-FtLi13	cluster68118-TRINITY_DN84240_c0_g1_i1	0.48	2.53	3.57	3.88	5.41	0.5	0.57	0.39	0.51
	ICE1-FtLi14	cluster72240-TRINITY_DN66562_c0_g1_i1	0.32	1.39	1.91	2.42	7.7	0.2	0.21	0.06	1
	ICE1-FtLi15	cluster74675-TRINITY_DN11690_c0_g1_i1	0	2.27	1.13	0.75	16.98	0.07	0	0	0.28
	ICE1-FtLi16	cluster75830-TRINITY_DN83665_c0_g1_i1	0.03	1.96	0.71	0.2	2.72	0	0	0	0.28
	ICE1-FtLi17	cluster1177-TRINITY_DN14996_c0_g1_i21	0.19	2.89	2.43	4.71	11.17	0.34	0.62	0.36	0.56
	ICE1-FtLi18	cluster85338-TRINITY_DN81942_c0_g1_i1	0	0.23	0.72	0.25	3.6	0	0.04	0.06	0.05
	ICE1-FtLi19	cluster15947-TRINITY_DN803_c0_g1_i11	2.86	8.9	11.33	13.4	18.71	1.56	1.17	1.49	2.59
	ICE1-FtLi20	cluster22778-TRINITY_DN9048_c0_g1_i2	0.03	0.76	0.62	0.13	9.02	0	0	0	0
	ICE1-FtLi21	cluster1872-TRINITY_DN5604_c1_g1_i7	4.44	4.82	4.45	3.44	13.99	3.18	2.94	3.98	3.93
	ICE1-FtLi22	cluster10141-TRINITY_DN15374_c0_g1_i25	0	0.85	0.77	0.49	10.11	0	0	0.08	0.11

## Sheet: Glucose metabolism
		ID	A	B	C	D	E	b	c	d	e
	AMY-FtLi1	cluster9741-TRINITY_DN907_c0_g1_i3	13.78	21.89	20.47	21.23	15.11	11.5	10.29	13.97	21.49
	AMY-FtLi2	cluster61133-TRINITY_DN51904_c0_g1_i1	19.26	15.91	16.88	14.12	14.06	16.33	14.61	12.3	19.21
	AMY-FtLi3	cluster69474-TRINITY_DN6326_c0_g1_i2	0.56	10.73	7.08	2.65	9.19	0	0.51	3.21	4.03
	AMY-FtLi4	cluster10502-TRINITY_DN6326_c0_g1_i6	41.02	32.69	32.56	32.38	24.1	37.94	36.71	43.8	47.14
	AMY-FtLi5	cluster97412-TRINITY_DN57762_c0_g1_i2	5.31	6.21	7.62	7.23	7.43	4.79	4.7	1.99	4.56
	BAM-FtLi1	cluster36196-TRINITY_DN39905_c0_g1_i1	0	1.51	0.8	1.04	0.8	0	1.03	0.33	4.04
	BAM-FtLi2	cluster36197-TRINITY_DN39905_c0_g2_i1	0	1.95	1.06	0.85	0.45	0.78	0.33	0.18	1.69
	BAM-FtLi3	cluster36198-TRINITY_DN39905_c0_g3_i1	0	1.89	1.69	0.55	0.52	0.1	0.36	0.51	1.93
	BAM-FtLi4	cluster36502-TRINITY_DN2284_c0_g1_i1	7.96	9.17	9.19	8.68	6.32	7.12	6.36	3.29	6.55
	BAM-FtLi5	cluster37890-TRINITY_DN30499_c0_g1_i1	247.51	275.84	236.1	180.25	84.98	239.92	231.46	78.2	167.81
	BAM-FtLi6	cluster41315-TRINITY_DN3791_c0_g2_i1	11.64	11.35	10.87	11.01	9.71	9.59	9.29	6.7	9.53
	BAM-FtLi7	cluster11950-TRINITY_DN14625_c0_g2_i2	2.86	62.94	67.96	66.38	82.48	1.89	1.9	4.45	4.61
	BAM-FtLi8	cluster79103-TRINITY_DN75949_c0_g1_i1	0.52	4.29	4.58	1.39	4.65	0.51	0.23	0.44	3.38
	CESA-FtLi1	cluster35413-TRINITY_DN67771_c0_g1_i1	0	0.09	0.11	0.12	2.66	0	0	0	0.18
	CESA-FtLi2	cluster60751-TRINITY_DN1912_c1_g1_i14	9.16	11.87	12.47	11.36	10.78	9.89	9.09	3.37	4.95
	CESA-FtLi3	cluster73608-TRINITY_DN5555_c0_g1_i5	3.45	18.75	15.83	39.32	64.24	11.66	13.47	55.16	32.26
	CESA-FtLi4	cluster9170-TRINITY_DN22371_c0_g1_i3	1.47	0.63	0.78	0.61	0.52	1.26	1.67	1.14	0.82
	CESA-FtLi5	cluster83103-TRINITY_DN30708_c0_g1_i1	0	0	0	0.04	3.85	0	0	0	0
	CESA-FtLi6	cluster85044-TRINITY_DN42444_c0_g1_i1	0	0.24	0.23	0.08	1.72	0	0.26	0	0.08
	CESA-FtLi7	cluster85045-TRINITY_DN42444_c0_g2_i1	0.31	0.07	0.18	0.03	1.17	0.27	0.39	0.5	0.63
	CSLC-FtLi1	cluster6906-TRINITY_DN8051_c0_g1_i3	0.22	5.35	6.55	7.88	26.38	0.2	0.15	0.26	1.57
	CSLC-FtLi2	cluster37346-TRINITY_DN29126_c0_g1_i1	0.37	2.23	2.75	2.81	21.92	0.28	0.11	0.34	0.36
	CSLC-FtLi3	cluster14259-TRINITY_DN1275_c1_g2_i8	0.88	3.25	2.94	3.3	4.87	0.79	0.41	0.8	1.43
	CSLC-FtLi4	cluster13126-TRINITY_DN1275_c1_g2_i9	6.42	19.43	17.01	17.87	36.89	5.81	5.72	9.35	9.12
	CSLC-FtLi5	cluster54072-TRINITY_DN2863_c0_g1_i3	0.07	0.16	0.1	0.08	2.83	0.25	0.14	0	0.2
	CSLC-FtLi6	cluster64295-TRINITY_DN4714_c1_g1_i1	2.93	3.36	2.98	3.45	6.94	5.22	4.76	3.95	4.89
	CSLC-FtLi7	cluster13305-TRINITY_DN4714_c1_g1_i2	4.32	4.52	3.48	2.97	9.53	2.94	3.06	1.87	4.96
	MAN-FtLi1	cluster15419-TRINITY_DN78799_c0_g1_i4	6.03	9.32	9.47	8.45	12.64	6.3	5.36	4.09	7.81
	MAN-FtLi2	cluster3636-TRINITY_DN23160_c0_g1_i3	4.87	7.16	7.73	6.65	12.91	5.37	3.79	2.51	7.33
	MAN-FtLi3	cluster4325-TRINITY_DN1925_c0_g1_i2	3.28	5.58	5.28	5.08	7.56	3.21	2.91	1.52	3.58
	MAN-FtLi4	cluster62377-TRINITY_DN3479_c0_g1_i1	14	23.01	23.69	23.26	27.86	14.59	13.05	12.84	17.32
	MAN-FtLi5	cluster70741-TRINITY_DN63315_c0_g1_i1	7	8.59	8.83	8.05	8.76	8.19	7.57	5.42	7.01
	UGT-FtLi1	cluster38618-TRINITY_DN6614_c0_g2_i1	11.75	27.73	31.59	31.35	22.88	10.22	9.09	8.89	23.74
	UGT-FtLi2	cluster38847-TRINITY_DN5271_c1_g1_i1	0.06	0.12	0.16	0.23	16.43	0	0.06	0	0.25
	UGT-FtLi3	cluster17110-TRINITY_DN35501_c0_g1_i10	2.83	5.75	5.63	5.41	13.81	2.56	3.14	1.36	4.81
	UGT-FtLi4	cluster54644-TRINITY_DN35501_c0_g1_i13	4.53	2.72	2.53	1.72	0.66	2.83	4.66	6.3	3.01
	UGT-FtLi5	cluster54645-TRINITY_DN35501_c0_g1_i16	3.36	7.09	6.17	5.85	11.02	3.83	2.6	3.16	5.89
	UGT-FtLi6	cluster55847-TRINITY_DN43064_c0_g2_i3	0.03	0.47	0.85	0.6	0.97	0.13	0.05	0.06	0.36
	UGT-FtLi7	cluster59997-TRINITY_DN4399_c0_g1_i1	1.72	4.26	3.06	3.17	35.47	2.79	3.04	11.27	6.45
	UGT-FtLi8	cluster13559-TRINITY_DN4399_c0_g2_i1	0.8	1.53	1.34	0.63	3.85	2.72	2.31	1.48	3.53
